# Supplementary material for: Template-free synthesis of hierarchical porous calcium carbonate microspheres for efficient water treatment
Source: Royal Society of Chemistry journal article supplement (doi:10.1039/c5ra18366a), 2015-12-01
Supplement: c5ra18366a1.pdf [file c5ra18366a1.pdf]

## Supporting Information

### Template-free Synthesis of Hierarchical Porous Calcium Carbonate Microsphere for Efficient Water Treatment

Jing Zhang, Bin Yao, Hang Ping, Zhengyi Fu\*, Yu Li\*, Weimin Wang, Hao Wang, Yucheng Wang, Jingyong Zhang and Fan Zhang

State Key Laboratory of Advanced Technology for Materials Synthesis and Processing, Wuhan University of Technology, Wuhan 430070, P.R. China

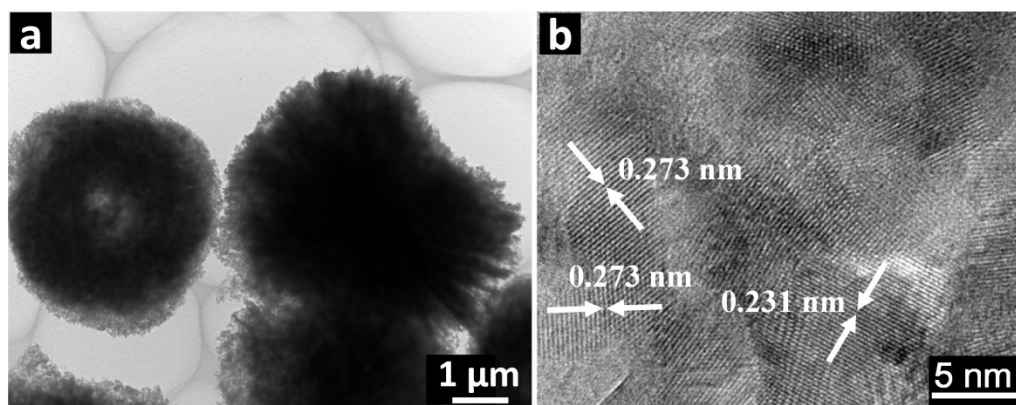

**Figure S1.** (a) TEM image and (b) HRTEM image of the hierarchical porous vaterite microspheres, with lattice fringes corresponding to vaterite  $\text{CaCO}_3$  phase. ( $d = 0.273$  nm,  $d = 0.231$  nm)

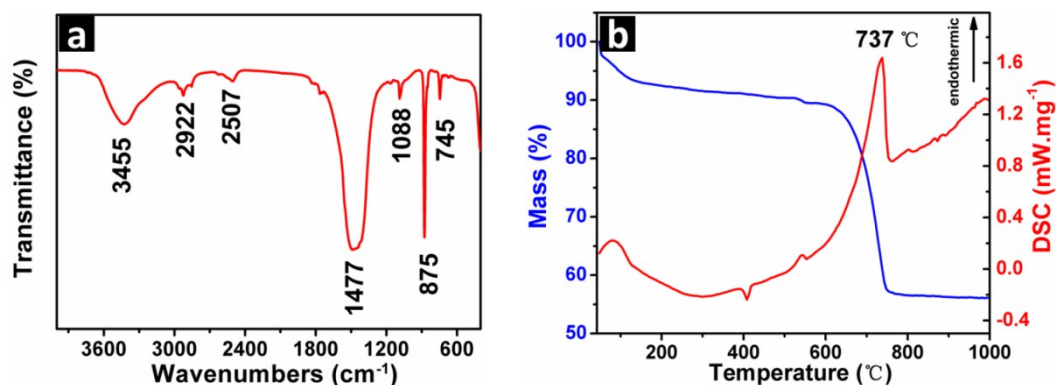

**Figure S2.** (a) FT-IR spectrum, and (b) TG-DSC curves of the hierarchical porous vaterite microspheres.

The FT-IR spectrum (Figure S1a) confirms the vaterite phase, with absorption bands of 745 cm<sup>-1</sup>, 875 cm<sup>-1</sup>, 1088 cm<sup>-1</sup> and 1477 cm<sup>-1</sup> for CO<sub>3</sub><sup>2-</sup> vibration of vaterite. The absorption bands of 2922 cm<sup>-1</sup> and 2507 cm<sup>-1</sup> are likely assigned to C-H stretching, and the stretching vibration of N-H in R<sub>2</sub>-NH<sub>2</sub><sup>+</sup> or R<sub>3</sub>-NH<sup>+</sup>, suggesting that there are organic residues in the CaCO<sub>3</sub> product. The TG-DSC curves show that water molecules and organic residues exist in the product, with the total weight percentage of around 8.8 %. (calculated by the total weight loss of the product below 560 °C.) The peak at 737 °C corresponds to the decomposition of the sample into CaO and CO<sub>2</sub>, which is consistent with previous work.<sup>11</sup>

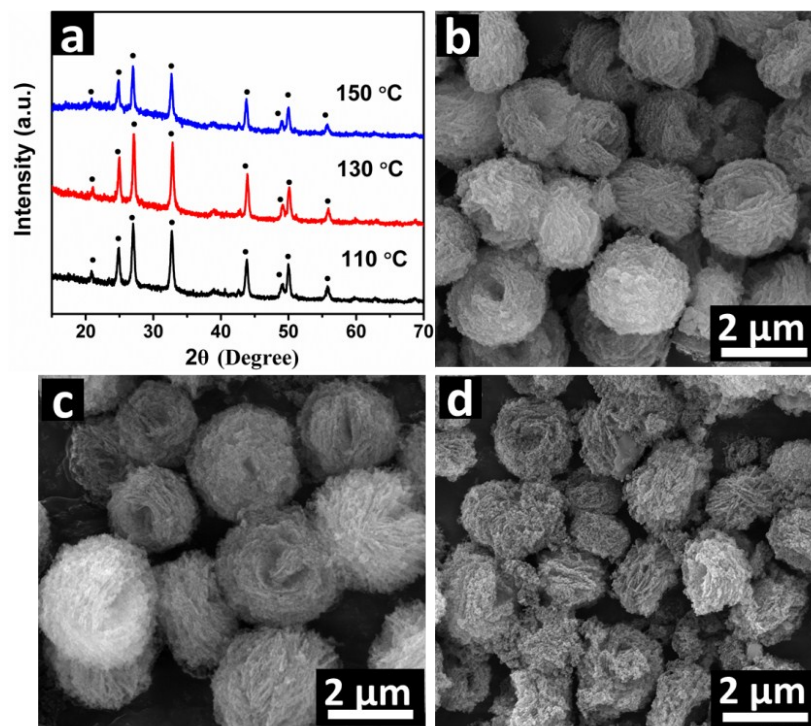

**Figure S3.** (a) XRD patterns, and (b-d) FESEM image of the hierarchical porous vaterite calcium carbonate microspheres synthesized at (b) 110 °C, (c) 130 °C, and (d) 150 °C for 4h.

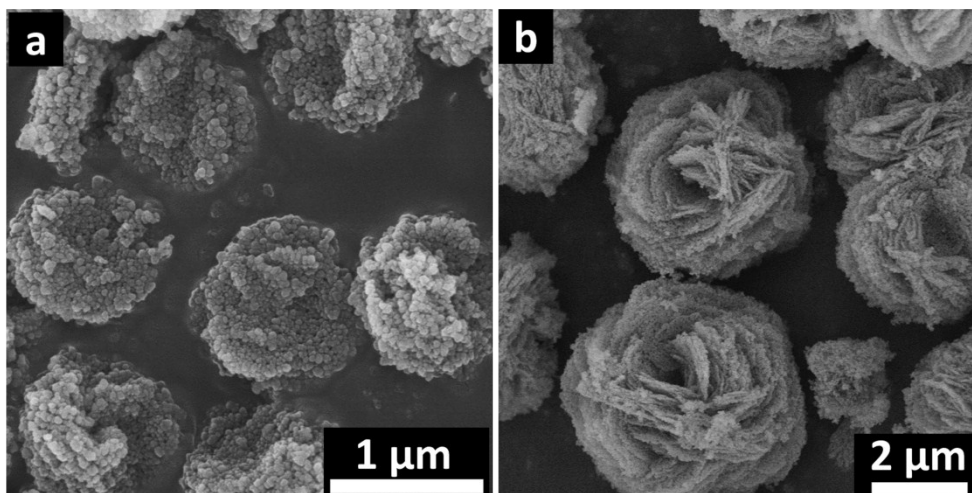

**Figure S4.** FESEM images of (a) the intermediate particles of the hierarchical porous vaterite  $\text{CaCO}_3$  microspheres synthesized at 130 °C for 1.75 h, and (b) the matured product after reaction for 4 h.

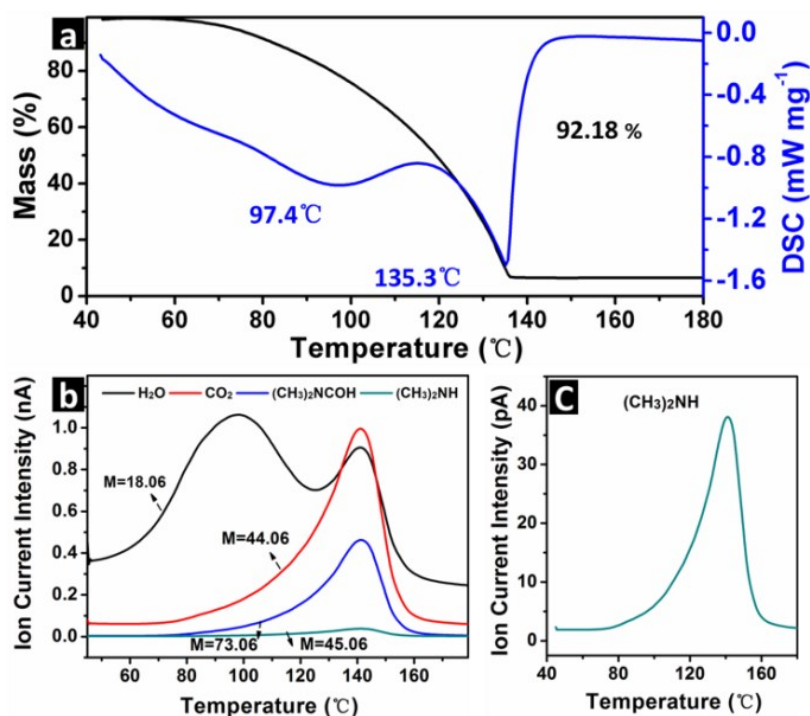

**Figure S5.** (a) TG-DSC curves, and (b) TG-MS curves of the DMF/ $\text{H}_2\text{O}$  mixed solvents (9:1 v/v) at temperature rising from 40 °C to 180 °C at a heating rate of 5 °C/min. The m/z ion peaks for different curves are  $8.15\text{E-}10$  for  $\text{H}_2\text{O}$ ,  $9.95\text{E-}10$  for  $\text{CO}_2$ ,  $4.6\text{E-}10$  for  $(\text{CH}_3)_2\text{NCOH}$ , and  $3.85\text{E-}11$  for  $(\text{CH}_3)_2\text{NH}$ . (c) the enlarged TG-MS

curve of Figure 3b, which corresponds to the release of the  $(\text{CH}_3)_2\text{NH}$  as temperature increases.

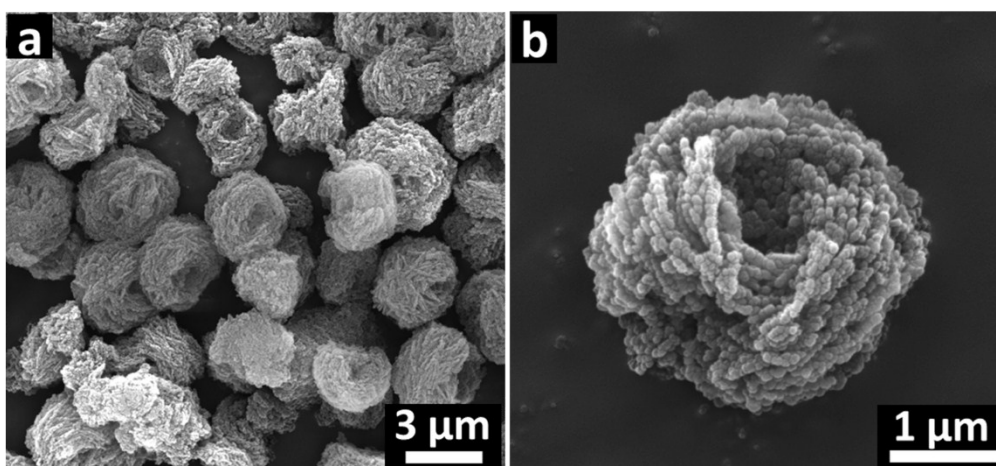

**Figure S6.** FESM images of the sediments after being treated by the hierarchical porous vaterite microspheres.

**Table S1.** Adsorption isotherm parameter for the adsorption of Congo red on the hierarchical porous  $\text{CaCO}_3$  microspheres

| Langmuir                 |       |       | Freundlich |       |       |
|--------------------------|-------|-------|------------|-------|-------|
| $q_m (\text{mg g}^{-1})$ | $k_L$ | $R^2$ | $k_f$      | $n$   | $R^2$ |
| 275.5                    | 0.136 | 0.994 | 84.405     | 4.214 | 0.833 |

**Table S2.** Adsorption kinetic parameter for the adsorption of congo red on the hierarchical porous  $\text{CaCO}_3$  microspheres

| Initial<br>Concentration<br>( $\text{mmol L}^{-1}$ ) | Pseudo-first-order model |                    |       |       | Pseudo-second-order model |                    |                      |       |
|------------------------------------------------------|--------------------------|--------------------|-------|-------|---------------------------|--------------------|----------------------|-------|
|                                                      | $q_{e,\text{exp}}$       | $q_{e,\text{cal}}$ | $k_1$ | $R^2$ | $q_{e,\text{exp}}$        | $q_{e,\text{cal}}$ | $k_2(\text{e}^{-2})$ | $R^2$ |

|     |       |       |       |       |       |       |       |       |
|-----|-------|-------|-------|-------|-------|-------|-------|-------|
| 0.1 | 133.7 | 132.8 | 5.421 | 0.968 | 133.7 | 134.2 | 7.658 | >0.99 |
|-----|-------|-------|-------|-------|-------|-------|-------|-------|

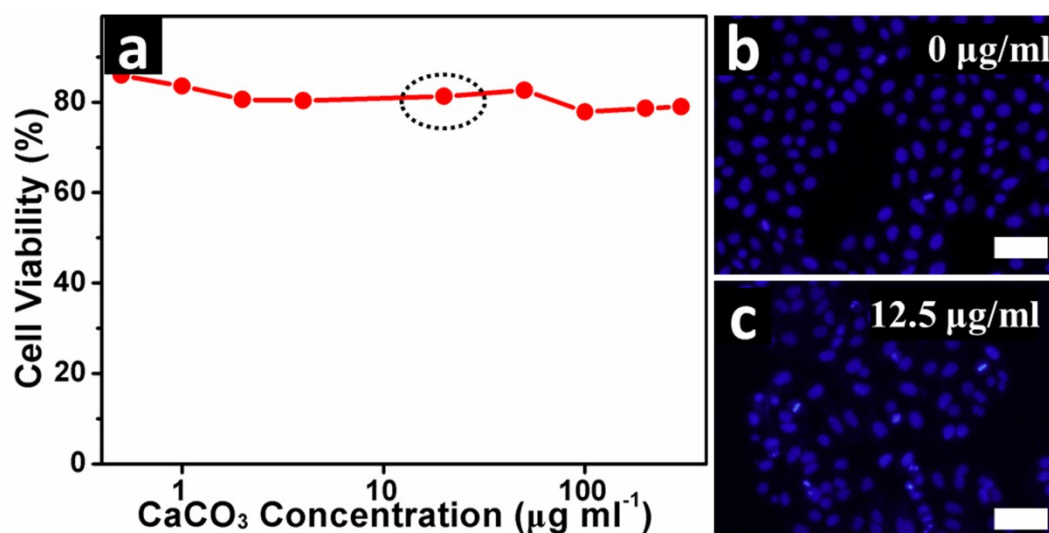

**Figure S7.** (a) The cytotoxicity towards HepG2 cells after con-incubating with the sample of different concentrations, ranging from 0.15~300 μg ml<sup>-1</sup>. (b,c) Fluorescence images of HepG2 cells con-incubated with the suspensions of (b) 0 μg ml<sup>-1</sup> and (c) 12.5 μg ml<sup>-1</sup> of the sample, corresponding to the star-marked point in Figure 5a. The scale bar inset is 100 μm.

**Table S3.** Maximum removal capacities of various inorganic adsorbents for Pb<sup>2+</sup> and Cd<sup>2+</sup>

| Adsorbents                                                            | Maximum removal capacity (mg g <sup>-1</sup> ) |                  | PH | Reference    |
|-----------------------------------------------------------------------|------------------------------------------------|------------------|----|--------------|
|                                                                       | Pb <sup>2+</sup>                               | Cd <sup>2+</sup> |    |              |
| Hierarchical porous vaterite CaCO <sub>3</sub> microsphere            | 1960                                           | 1040             | -- | Present work |
| Polyacrylic acid stabilized amorphous calcium carbonate nanoparticles | 1028.21                                        | 514.62           | -- | [10]         |
| Polydopamine-functionalized graphene hydrogel                         | 336.32                                         | 145.48           | 6  | [30]         |
| Few-layered graphene oxide nanosheets                                 |                                                | 106.3            | 6  | [33]         |
| Carboxylate-rich carbonaceous materials                               | 351.4                                          | 88.8             | 6  | [31]         |
| Nitric acid treated multiwalled carbon nanotubes (CNTs)               | 97.08                                          | 10.86            | 5  | [32]         |

**Table S4.** Maximum removal capacities of various inorganic adsorbents for congo red

| Adsorbents                                                 | Maximum removal capacity (mg g <sup>-1</sup> ) | Reference    |
|------------------------------------------------------------|------------------------------------------------|--------------|
| Hierarchical porous vaterite CaCO <sub>3</sub> microsphere | 272                                            | Present work |
| FeOOH hierarchical nanostructures                          | 240                                            | [4]          |
| Urchin-like $\alpha$ -FeOOH hollow spheres                 | 275                                            | [5]          |
| MnO <sub>2</sub> hierarchical hollow nanostructures        | 80                                             | [34]         |
| Mesoporous Fe <sub>2</sub> O <sub>3</sub>                  | 53                                             | [35]         |
